# Supplementary material for: Comparative evaluation of a new magnetic bead-based DNA extraction method from fecal samples for downstream next-generation 16S rRNA gene sequencing
Source: PLoS One. 2018 Aug 23;13(8):e0202858. doi: 10.1371/journal.pone.0202858 (PMC6107275; doi:10.1371/journal.pone.0202858)
Supplement: S4 Table — As with data analyzed using QIIME, there were no differences in the relative abundance of major phyla between the two groups (Bacteroidetes: QIAamp® PowerFecal® vs. Maxwell® RSC: 58.3% vs. 57.3%, p ≤ 0.52; Firmicutes: QIAamp® PowerFecal® vs. Maxwell® RSC 36.2% vs. 37.3%, p ≤ 0.59). At the genus level, within the top 30 most abundant bacterial genera, 6 were significantly between the QIAamp® PowerFecal® and Maxwell® RSC kits (Lactobacillus: 0.7% vs. 0.1%, p ≤ 0.000; an unclassified genus within Clostridiaceae: 0.4% vs. 0.1%, p ≤ 0.01; two genera within Ruminococcaceae: 0.7% vs. 0.4%, p ≤ 0.01 and 1.3% vs. 1.9%, p ≤ 0.01; and two genera within Lachnospiraceae: 0.1% vs. 0.3%, p ≤ 0.01 and 0.1% vs. 0.3%, p ≤ 0.01). However, investigation of individual de novo OTUs (FDR < 0.01) revealed that with 495 unique OTUs identified, only 1 OTU (k_Bacteria; p_Firmicutes; c_Clostridia; o_Clostridiales; f_[Mogibacteriaceae]; g_; s_) was differentially abundant between the two kits. (XLSX) [file pone.0202858.s004.xlsx]

## Sheet: DADA2 & Greengenes_phylum raw
Kit	ID	NA;NA	k__Bacteria;NA	k__Bacteria;p__Actinobacteria	k__Bacteria;p__Bacteroidetes	k__Bacteria;p__Cyanobacteria	k__Bacteria;p__Firmicutes	k__Bacteria;p__Proteobacteria	k__Bacteria;p__TM7	k__Bacteria;p__Tenericutes	k__Bacteria;p__Verrucomicrobia
MO BIO	Mobio65C.41.PreSD	0	0	0.0043573	0.608569	0	0.207698	0.143791	0.0355846	0	0
MO BIO	Mobio65C.42.PreSD	0	0.00074869	0.00174694	0.727227	0	0.175443	0.0796107	0.0114799	0.00374345	0
MO BIO	Mobio65C.43.PreSD	0	0	0.0024975	0.713287	0	0.149351	0.12013	0.0147353	0	0
MO BIO	Mobio65C.44.PreSD	0	0	0.0175579	0.644852	0.00266028	0.237031	0.0742219	0.0236765	0	0
MO BIO	Mobio65C.45.PreSD	0	0	0.00572068	0.755254	0.00373088	0.157941	0.0615595	0.0157941	0	0
MO BIO	Mobio65C.46.PreSD	0	0	0	0.446231	0	0.495477	0	0	0.041206	0.0170854
MO BIO	Mobio65C.47.PreSD	0	0	0	0.476023	0	0.452789	0.0183709	0	0.0307983	0.0220181
MO BIO	Mobio65C.48.PreSD	0	0	0	0.513734	0	0.442836	0.00965108	0	0.0185598	0.015219
MO BIO	Mobio65C.49.PreSD	0	0.000884173	0	0.483643	0	0.469054	0.00839965	0	0.0176835	0.020336
MO BIO	Mobio65C.50.PreSD	0	0	0	0.29697	0	0.70303	0	0	0	0
MO BIO	Mobio65C.51.PreSD	0	0	0	0.549438	0	0.429213	0.0213483	0	0	0
MO BIO	Mobio65C.52.PreSD	0	0	0	0.594514	0	0.370514	0.00777143	0	0.0272	0
MO BIO	Mobio65C.53.PreSD	0	0	0	0.537243	0	0.441773	0.00569761	0	0.0152863	0
MO BIO	Mobio65C.54.PreSD	0	0	0	0.558513	0	0.415328	0.00887257	0	0.0172862	0
MO BIO	Mobio65C.55.PreSD	0	0	0	0.639278	0	0.33397	0.00721868	0	0.018259	0.00127389
MO BIO	Mobio65C.56.PreSD	0	0	0	0.576175	0	0.37423	0.0148305	0	0.0163713	0.0183937
MO BIO	Mobio65C.57.PreSD	0	0	0	0.532678	0	0.416227	0.0123449	0	0.0220491	0.0167019
MO BIO	Mobio65C.58.PreSD	0	0	0	0.554682	0	0.383759	0.0137525	0	0.0235756	0.0242305
MO BIO	Mobio65C.59.PreSD	0	0	0	0.651737	0	0.308916	0.0146505	0	0.00502302	0.0196735
MO BIO	Mobio65C.60.PreSD	0	0	0	0.61759	0	0.340065	0.0117264	0	0.0162866	0.0143322
MO BIO	Mobio65C.61.PreSD	0	0	0	0.562019	0	0.37273	0.0141582	0	0.0335488	0.0175439
MO BIO	Mobio65C.62.PreSD	0	0	0	0.59501	0	0.355776	0.00820232	0	0.0293917	0.01162
MO BIO	Mobio65C.63.PreSD	0	0	0	0.551432	0	0.411458	0.00585938	0	0.0201823	0.0110677
MO BIO	Mobio65C.64.PreSD	0	0	0	0.644628	0	0.299775	0.0187829	0	0.0202855	0.0165289
MO BIO	Mobio65C.65.PreSD	0	0	0	0.584665	0	0.363957	0.00686342	0	0.0389254	0.00558878
MO BIO	Mobio65C.66.PreSD	0	0	0.00514037	0.719257	0	0.232503	0.022934	0.00553578	0.00197707	0.0126532
MO BIO	Mobio65C.67.PreSD	0	0	0.00515198	0.746651	0	0.20814	0.0312983	0.00515198	0.00206079	0.0015456
MO BIO	Mobio65C.68.PreSD	0	0	0	0.785425	0	0.167341	0.0350877	0	0.0121457	0
MO BIO	Mobio65C.69.PreSD	0	0	0.00284206	0.715185	0	0.211937	0.0576533	0.00609013	0.00426309	0.00203004
MO BIO	Mobio65C.70.PreSD	0	0	0.00174571	0.695665	0	0.248473	0.042188	0.00349142	0	0.00843759
MO BIO	Mobio65C.71.PreSD	0	0	0	0.651567	0	0.3279	0	0	0.00799373	0.0125392
MO BIO	Mobio65C.72.PreSD	0	0	0	0.62616	0	0.350928	0	0	0.0136311	0.00928074
MO BIO	Mobio65C.73.PreSD	0	0	0	0.577725	0	0.386738	0	0	0.0208457	0.0146913
MO BIO	Mobio65C.74.PreSD	0	0	0	0.57951	0	0.404326	0	0	0.00665557	0.00950796
MO BIO	Mobio65C.75.PreSD	0	0	0	0.595331	0	0.380999	0	0	0.0142672	0.00940337
MO BIO	Mobio65C.76.PreSD	0	0	0	0.450167	0	0.483416	0	0	0.0497528	0.016664
MO BIO	Mobio65C.77.PreSD	0	0	0.0027137	0.507802	0	0.408752	0	0	0.0658073	0.0149254
MO BIO	Mobio65C.78.PreSD	0	0	0	0.29652	0	0.652042	0	0	0.0332829	0.0181543
MO BIO	Mobio65C.79.PreSD	0	0	0.00414708	0.449267	0	0.494056	0	0	0.0464473	0.00608239
MO BIO	Mobio65C.80.PreSD	0.00058072	0	0	0.512776	0	0.418409	0	0	0.0537166	0.014518
Promega	Promega.41.PreSD	0	0	0	0.697322	0.00349243	0.197128	0.0853706	0.0166861	0	0
Promega	Promega.42.PreSD	0	0	0	0.585262	0.00578704	0.342207	0.0551698	0.0100309	0.00154321	0
Promega	Promega.43.PreSD	0	0	0	0.70781	0	0.20377	0.0682226	0.0201975	0	0
Promega	Promega.44.PreSD	0	0	0	0.614629	0.00411429	0.302857	0.0603429	0.0180571	0	0
Promega	Promega.45.PreSD	0	0	0	0.67033	0	0.233191	0.0802757	0.0149004	0.00130378	0
Promega	Promega.46.PreSD	0	0	0	0.467782	0	0.447971	0.0107713	0	0.0521254	0.0213503
Promega	Promega.47.PreSD	0	0	0	0.54517	0	0.387075	0.0147585	0	0.0281753	0.0248211
Promega	Promega.48.PreSD	0	0.000444741	0	0.461641	0	0.500334	0.00622637	0	0.0237936	0.0075606
Promega	Promega.49.PreSD	0	0	0	0.565039	0	0.380907	0.0165955	0	0.0169116	0.0205469
Promega	Promega.50.PreSD	0	0	0	0.499744	0	0.457801	0.00716113	0	0.0225064	0.0127877
Promega	Promega.51.PreSD	0	0	0	0.613214	0	0.364763	0.0220234	0	0	0
Promega	Promega.52.PreSD	0	0	0	0.314043	0	0.66383	0	0	0.0221277	0
Promega	Promega.53.PreSD	0	0	0	0.570495	0	0.401192	0.00859697	0	0.0149014	0.00481431
Promega	Promega.54.PreSD	0	0	0	0.582065	0	0.388592	0.00822707	0	0.0211161	0
Promega	Promega.55.PreSD	0	0	0	0.494492	0	0.483629	0.00321297	0	0.0186659	0
Promega	Promega.56.PreSD	0	0	0	0.591944	0	0.359591	0.0143223	0	0.0113811	0.0227621
Promega	Promega.57.PreSD	0	0	0	0.519596	0	0.429335	0.010095	0	0.0267221	0.0142518
Promega	Promega.58.PreSD	0	0.000496853	0	0.581981	0	0.358314	0.0195429	0	0.0153196	0.0243458
Promega	Promega.59.PreSD	0	0	0	0.557732	0	0.400312	0.0138696	0	0.00121359	0.0268724
Promega	Promega.60.PreSD	0	0	0	0.549016	0	0.410521	0.00993195	0	0.0150818	0.0154497
Promega	Promega.61.PreSD	0	0	0	0.508505	0	0.417983	0.0121507	0	0.0400972	0.0212637
Promega	Promega.62.PreSD	0	0	0	0.58698	0	0.348376	0.0158561	0	0.0341515	0.0146364
Promega	Promega.63.PreSD	0	0.00043153	0	0.572353	0	0.379459	0.0155351	0	0.0199942	0.0122267
Promega	Promega.65.PreSD	0	0	0	0.522353	0	0.423798	0.0101603	0	0.0320614	0.0116279
Promega	Promega.66.PreSD	0	0	0.00231238	0.656716	0	0.285894	0.0210217	0.00819844	0.00462476	0.0212319
Promega	Promega.67.PreSD	0	0	0.00215924	0.77193	0	0.189069	0.0309042	0.00377868	0.00215924	0
Promega	Promega.68.PreSD	0	0	0	0.57241	0	0.346578	0.0671245	0.00293187	0.0109559	0
Promega	Promega.69.PreSD	0	0	0	0.726941	0	0.228932	0.0311878	0.00597213	0.00331785	0.00364964
Promega	Promega.70.PreSD	0	0	0.00229406	0.751616	0	0.191449	0.0250261	0.00646507	0.00145985	0.0216893
Promega	Promega.71.PreSD	0	0	0	0.643634	0	0.321497	0	0	0.0233525	0.0115163
Promega	Promega.72.PreSD	0	0	0	0.531503	0	0.449437	0	0	0.0078017	0.0112581
Promega	Promega.73.PreSD	0	0	0	0.586152	0	0.385631	0	0	0.0162097	0.0120072
Promega	Promega.74.PreSD	0	0	0	0.616761	0	0.365046	0	0	0.00864897	0.00954369
Promega	Promega.75.PreSD	0	0	0	0.597615	0	0.376229	0	0	0.017263	0.00889307
Promega	Promega.76.PreSD	0	0	0	0.436536	0	0.517004	0	0	0.0304776	0.0159822
Promega	Promega.77.PreSD	0	0	0	0.472278	0	0.48163	0	0	0.0285571	0.0175351
Promega	Promega.78.PreSD	0	0	0	0.46069	0	0.456552	0	0	0.0721839	0.0105747
Promega	Promega.79.PreSD	0	0	0	0.46587	0	0.42628	0	0	0.101365	0.00648464
Promega	Promega.80.PreSD	0	0	0	0.662252	0	0.245033	0	0	0.0701987	0.0225166

## Sheet: DAD2 & Greengenes_phylum table
	QIAamp® PowerFecal®	Maxwell® RSC PureFood GMO and Authentication	p value
k__Bacteria;p__Actinobacteria	0.13 ± 0.31	0.02 ± 0.06	0.01191
k__Bacteria;p__Cyanobacteria	0.02 ± 0.07	0.03 ± 0.12	0.4221
k__Bacteria;p__Bacteroidetes	58.31 ± 11.00	57.26 ± 9.36	0.5228
k__Bacteria;p__Verrucomicrobia	0.96 ± 0.78	1.10 ± 0.89	0.5655
k__Bacteria;p__Firmicutes	36.21 ± 12.29	37.31 ± 10.08	0.5882
k__Bacteria;p__TM7	0.30 ± 0.74	0.27 ± 0.56	0.7694
k__Bacteria;p__Proteobacteria	2.19 ± 3.29	1.91 ± 2.38	0.8164
k__Bacteria;p__Tenericutes	1.87 ± 1.67	2.10 ± 2.19	0.8261

## Sheet: DADA2 & Greengenes_genus raw
Kit	ID	NA;NA;NA;NA;NA;NA	k__Bacteria;NA;NA;NA;NA;NA	k__Bacteria;p__Actinobacteria;c__Actinobacteria;o__Bifidobacteriales;f__Bifidobacteriaceae;g__Bifidobacterium	k__Bacteria;p__Actinobacteria;c__Coriobacteriia;o__Coriobacteriales;f__Coriobacteriaceae;g__	k__Bacteria;p__Bacteroidetes;c__Bacteroidia;o__Bacteroidales;f__;g__	k__Bacteria;p__Bacteroidetes;c__Bacteroidia;o__Bacteroidales;f__Bacteroidaceae;g__Bacteroides	k__Bacteria;p__Bacteroidetes;c__Bacteroidia;o__Bacteroidales;f__Porphyromonadaceae;g__Parabacteroides	k__Bacteria;p__Bacteroidetes;c__Bacteroidia;o__Bacteroidales;f__Prevotellaceae;g__Prevotella	k__Bacteria;p__Bacteroidetes;c__Bacteroidia;o__Bacteroidales;f__Rikenellaceae;g__	k__Bacteria;p__Bacteroidetes;c__Bacteroidia;o__Bacteroidales;f__Rikenellaceae;g__AF12	k__Bacteria;p__Bacteroidetes;c__Bacteroidia;o__Bacteroidales;f__Rikenellaceae;g__Rikenella	k__Bacteria;p__Bacteroidetes;c__Bacteroidia;o__Bacteroidales;f__S24-7;g__	k__Bacteria;p__Bacteroidetes;c__Bacteroidia;o__Bacteroidales;f__[Odoribacteraceae];g__Odoribacter	k__Bacteria;p__Bacteroidetes;c__Bacteroidia;o__Bacteroidales;f__[Paraprevotellaceae];g__Paraprevotella	k__Bacteria;p__Bacteroidetes;c__Bacteroidia;o__Bacteroidales;f__[Paraprevotellaceae];g__[Prevotella]	k__Bacteria;p__Cyanobacteria;c__4C0d-2;o__YS2;f__;g__	k__Bacteria;p__Firmicutes;c__Bacilli;o__Lactobacillales;f__Lactobacillaceae;g__Lactobacillus	k__Bacteria;p__Firmicutes;c__Bacilli;o__Turicibacterales;f__Turicibacteraceae;g__Turicibacter	k__Bacteria;p__Firmicutes;c__Clostridia;o__Clostridiales;NA;NA	k__Bacteria;p__Firmicutes;c__Clostridia;o__Clostridiales;f__;g__	k__Bacteria;p__Firmicutes;c__Clostridia;o__Clostridiales;f__Clostridiaceae;NA	k__Bacteria;p__Firmicutes;c__Clostridia;o__Clostridiales;f__Clostridiaceae;g__Clostridium	k__Bacteria;p__Firmicutes;c__Clostridia;o__Clostridiales;f__Clostridiaceae;g__SMB53	k__Bacteria;p__Firmicutes;c__Clostridia;o__Clostridiales;f__Dehalobacteriaceae;g__Dehalobacterium	k__Bacteria;p__Firmicutes;c__Clostridia;o__Clostridiales;f__Lachnospiraceae;NA	k__Bacteria;p__Firmicutes;c__Clostridia;o__Clostridiales;f__Lachnospiraceae;g__	k__Bacteria;p__Firmicutes;c__Clostridia;o__Clostridiales;f__Lachnospiraceae;g__Anaerostipes	k__Bacteria;p__Firmicutes;c__Clostridia;o__Clostridiales;f__Lachnospiraceae;g__Clostridium	k__Bacteria;p__Firmicutes;c__Clostridia;o__Clostridiales;f__Lachnospiraceae;g__Coprococcus	k__Bacteria;p__Firmicutes;c__Clostridia;o__Clostridiales;f__Lachnospiraceae;g__Defluviitalea	k__Bacteria;p__Firmicutes;c__Clostridia;o__Clostridiales;f__Lachnospiraceae;g__Dorea	k__Bacteria;p__Firmicutes;c__Clostridia;o__Clostridiales;f__Lachnospiraceae;g__[Ruminococcus]	k__Bacteria;p__Firmicutes;c__Clostridia;o__Clostridiales;f__Peptococcaceae;g__	k__Bacteria;p__Firmicutes;c__Clostridia;o__Clostridiales;f__Peptococcaceae;g__rc4-4	k__Bacteria;p__Firmicutes;c__Clostridia;o__Clostridiales;f__Ruminococcaceae;NA	k__Bacteria;p__Firmicutes;c__Clostridia;o__Clostridiales;f__Ruminococcaceae;g__	k__Bacteria;p__Firmicutes;c__Clostridia;o__Clostridiales;f__Ruminococcaceae;g__Anaerotruncus	k__Bacteria;p__Firmicutes;c__Clostridia;o__Clostridiales;f__Ruminococcaceae;g__Butyricicoccus	k__Bacteria;p__Firmicutes;c__Clostridia;o__Clostridiales;f__Ruminococcaceae;g__Clostridium	k__Bacteria;p__Firmicutes;c__Clostridia;o__Clostridiales;f__Ruminococcaceae;g__Oscillospira	k__Bacteria;p__Firmicutes;c__Clostridia;o__Clostridiales;f__Ruminococcaceae;g__Ruminococcus	k__Bacteria;p__Firmicutes;c__Clostridia;o__Clostridiales;f__[Mogibacteriaceae];g__	k__Bacteria;p__Firmicutes;c__Erysipelotrichi;o__Erysipelotrichales;f__Erysipelotrichaceae;NA	k__Bacteria;p__Firmicutes;c__Erysipelotrichi;o__Erysipelotrichales;f__Erysipelotrichaceae;g__	k__Bacteria;p__Firmicutes;c__Erysipelotrichi;o__Erysipelotrichales;f__Erysipelotrichaceae;g__Allobaculum	k__Bacteria;p__Firmicutes;c__Erysipelotrichi;o__Erysipelotrichales;f__Erysipelotrichaceae;g__Clostridium	k__Bacteria;p__Proteobacteria;c__Alphaproteobacteria;o__;f__;g__	k__Bacteria;p__Proteobacteria;c__Alphaproteobacteria;o__RF32;f__;g__
MO BIO	Mobio65C.41.PreSD	0	0	0.0043573	0	0	0.087146	0.00653595	0.0428468	0	0	0	0.455338	0	0	0.016703	0	0.00363108	0	0.0116195	0.0573711	0	0	0	0	0	0.0305011	0	0	0	0	0	0	0	0	0.00726216	0	0	0	0	0.0885984	0.0087146	0	0	0	0	0	0	0.0043573
MO BIO	Mobio65C.42.PreSD	0	0.00074869	0.00174694	0	0	0.112803	0.0094834	0.0361867	0.00848515	0	0	0.459945	0	0	0.100324	0	0.00074869	0	0.0169703	0.0476666	0	0	0	0	0.00299476	0.029698	0	0	0	0	0	0	0	0	0	0.0124782	0	0	0	0.0501622	0.0134764	0	0	0.00124782	0	0	0	0.00798602
MO BIO	Mobio65C.43.PreSD	0	0	0.0024975	0	0	0.0536963	0.003996	0.0454545	0.0044955	0	0	0.601149	0	0	0.0044955	0	0.00724276	0	0.00949051	0.036963	0	0	0	0	0.00224775	0.0307193	0	0	0	0	0	0.00274725	0	0	0.00174825	0	0	0	0	0.0452048	0.00949051	0.00274725	0	0	0.000749251	0	0	0
MO BIO	Mobio65C.44.PreSD	0	0	0.0175579	0	0	0.0430966	0.00478851	0.0356478	0.0066507	0	0	0.53046	0	0	0.0242086	0.00266028	0.00744879	0	0.0130354	0.0590583	0	0	0	0	0.00532056	0.0630487	0	0	0	0	0	0	0	0	0	0.0119713	0.00212823	0	0	0.0454908	0.0242086	0	0	0	0.00532056	0	0	0.00372439
MO BIO	Mobio65C.45.PreSD	0	0	0.00572068	0	0	0.0759856	0.00422833	0.0435269	0.00460142	0	0	0.572317	0	0	0.0545952	0.00373088	0.00323343	0	0.0123119	0.0559632	0	0	0	0.000746176	0.00385524	0.0128094	0	0	0	0	0	0.00261162	0.000621813	0	0.00236289	0.0073374	0	0	0	0.0354434	0.0206442	0	0	0	0	0	0	0.0039796
MO BIO	Mobio65C.46.PreSD	0	0	0	0	0	0.21608	0	0	0	0	0	0.230151	0	0	0	0	0	0	0.00502513	0.178894	0	0	0	0	0	0.117588	0	0	0	0	0	0	0	0	0.0120603	0.0130653	0	0	0	0.0653266	0.103518	0	0	0	0	0	0	0
MO BIO	Mobio65C.47.PreSD	0	0	0	0	0	0.113197	0	0	0	0	0	0.362826	0	0	0	0	0.0152641	0.00378225	0.00837498	0.151965	0.00445765	0.00121572	0	0	0.00243145	0.114683	0	0	0.00283669	0	0.00351209	0.0055383	0	0.00189113	0.0131028	0.0205322	0.00202621	0	0	0.0425503	0.0563285	0.00175604	0.000540321	0	0	0	0.00108064	0
MO BIO	Mobio65C.48.PreSD	0	0	0	0	0	0.186711	0	0	0	0	0	0.327023	0	0	0	0	0.0178174	0	0.00519673	0.123979	0	0	0	0	0.0126206	0.0994803	0.00148478	0.00074239	0.00296956	0	0.00890869	0.00334076	0	0	0.00593912	0.0155902	0	0	0	0.0850037	0.0597624	0	0	0	0	0	0	0
MO BIO	Mobio65C.49.PreSD	0	0.000884173	0	0	0	0.223696	0	0	0	0	0	0.259947	0	0	0	0	0.0141468	0	0.010168	0.179929	0	0	0	0	0	0.0888594	0	0	0.00176835	0	0.00795756	0	0	0	0.0145889	0.00486295	0.00397878	0	0	0.061008	0.081786	0	0	0	0	0	0.00176835	0
MO BIO	Mobio65C.50.PreSD	0	0	0	0	0	0.139394	0	0	0	0	0	0.157576	0	0	0	0	0	0	0	0.375758	0	0	0	0	0	0.0909091	0	0	0	0	0	0	0	0	0	0	0	0	0	0.121212	0.115152	0	0	0	0	0	0	0
MO BIO	Mobio65C.51.PreSD	0	0	0	0	0	0.149438	0	0	0	0	0	0.4	0	0	0	0	0.0258427	0.0157303	0.0213483	0.0764045	0	0	0	0	0.0134831	0.161798	0	0	0	0	0	0	0	0	0	0	0	0	0	0.0831461	0.0314607	0	0	0	0	0	0	0
MO BIO	Mobio65C.52.PreSD	0	0	0	0	0	0.239543	0	0	0.00914286	0	0	0.345829	0	0	0	0	0.00297143	0.0016	0.0048	0.130057	0.00342857	0	0	0	0	0.0612571	0	0.00137143	0.00457143	0	0.00342857	0.0016	0	0.00137143	0.0148571	0.0233143	0	0	0	0.0420571	0.0738286	0	0	0	0	0	0	0
MO BIO	Mobio65C.53.PreSD	0	0	0	0	0	0.207337	0	0	0	0	0	0.329906	0	0	0	0	0.00722624	0.00528071	0.0113952	0.110617	0.0105614	0	0	0	0.00555864	0.11826	0	0	0	0	0.00416898	0.00472485	0	0.00111173	0.0086159	0.0150083	0	0	0	0.0892162	0.0496109	0	0.000416898	0	0	0	0	0
MO BIO	Mobio65C.54.PreSD	0	0	0	0	0	0.226557	0	0	0	0	0	0.331957	0	0	0	0	0.00566009	0.00826067	0.0146856	0.145633	0.00489521	0	0	0	0.00749579	0.108613	0.0012238	0.000458926	0	0.0018357	0.00382438	0.00260058	0	0.0012238	0.00902555	0.0142267	0.0012238	0	0	0.0400795	0.0429861	0.00137678	0	0	0	0	0	0
MO BIO	Mobio65C.55.PreSD	0	0	0	0	0	0.306369	0	0	0	0	0	0.332909	0	0	0	0	0.0014862	0	0.0142251	0.113588	0.00318471	0	0	0	0.00806794	0.0683652	0	0	0	0.0014862	0.0029724	0.00360934	0	0	0.0089172	0.0225053	0.000849257	0	0	0.0322718	0.0511677	0.00127389	0	0	0	0	0	0
MO BIO	Mobio65C.56.PreSD	0	0	0	0	0	0.238444	0	0	0	0	0	0.337731	0	0	0	0	0.00154083	0.00163713	0.00934129	0.126445	0.00250385	0.00182974	0	0	0.00529661	0.0733821	0.00250385	0	0.00231125	0	0.00837827	0	0	0.00134823	0.00548921	0.019453	0.00173344	0	0	0.0415062	0.06953	0	0	0	0	0	0	0
MO BIO	Mobio65C.57.PreSD	0	0	0	0	0	0.137048	0	0	0	0	0	0.39563	0	0	0	0	0.00653552	0.004291	0.00316874	0.13916	0.00521521	0	0.000594138	0.000330077	0.00138632	0.0968445	0.00105625	0	0.00138632	0.000528123	0.0030367	0	0	0.00204647	0.0109585	0.0266042	0.000792184	0	0	0.0607341	0.0498416	0.00099023	0	0	0.000726168	0	0	0
MO BIO	Mobio65C.58.PreSD	0	0	0	0	0	0.199083	0	0	0	0	0	0.355599	0	0	0	0	0	0.0104781	0	0.115914	0	0	0	0	0.00589391	0.115259	0	0	0	0	0	0	0	0	0.0144073	0.0117878	0	0	0	0.0602489	0.0497708	0	0	0	0	0	0	0
MO BIO	Mobio65C.59.PreSD	0	0	0	0	0	0.239849	0	0	0	0	0	0.411888	0	0	0	0	0	0.0029301	0.00334868	0.112181	0.00125576	0.00376727	0	0	0	0.0657179	0	0	0	0	0.00334868	0.00334868	0	0	0.0117204	0.0184177	0	0	0	0.0510674	0.0318125	0	0	0	0	0	0	0
MO BIO	Mobio65C.60.PreSD	0	0	0	0	0	0.22671	0	0	0	0	0	0.390879	0	0	0	0	0	0.00521173	0.0104235	0.0996743	0.00586319	0	0	0	0.00260586	0.104235	0	0	0	0	0	0	0	0	0.00977199	0.0110749	0	0	0	0.0482085	0.0429967	0	0	0	0	0	0	0
MO BIO	Mobio65C.61.PreSD	0	0	0	0	0	0.224992	0	0	0	0	0	0.337027	0	0	0	0	0.00769468	0.00338566	0.00369344	0.160357	0.0153894	0	0	0	0	0.070791	0	0	0	0	0.00338566	0	0	0	0.00738689	0.0129271	0	0	0	0.033241	0.0544783	0	0	0	0	0	0	0
MO BIO	Mobio65C.62.PreSD	0	0	0	0	0	0.221121	0	0	0	0	0	0.373889	0	0	0	0	0.0112782	0.0105947	0.00717703	0.0775803	0.0119617	0	0	0	0	0.0878332	0	0	0.00307587	0	0.00341763	0	0	0.00205058	0.00512645	0.0140123	0	0	0	0.0652768	0.056391	0	0	0	0	0	0	0
MO BIO	Mobio65C.63.PreSD	0	0	0	0	0	0.276042	0	0	0	0	0	0.275391	0	0	0	0	0.0104167	0	0.016276	0.102214	0	0	0	0	0	0.117188	0	0	0	0	0	0	0	0.00260417	0.0208333	0.015625	0	0	0	0.0592448	0.0670573	0	0	0	0	0	0	0
MO BIO	Mobio65C.64.PreSD	0	0	0	0	0	0.371525	0	0	0	0	0	0.273103	0	0	0	0	0.00150263	0	0.00112697	0.110443	0.00450789	0	0	0	0	0.066867	0	0	0	0	0.00375657	0	0	0.00225394	0.00901578	0.0108941	0.00300526	0	0	0.0293013	0.0570999	0	0	0	0	0	0	0
MO BIO	Mobio65C.65.PreSD	0	0	0	0	0	0.240514	0	0	0	0	0	0.344151	0	0	0	0	0.00951074	0.0193156	0.01608	0.109422	0.0126483	0	0	0	0	0.0769683	0.000686342	0	0	0.00147073	0.000686342	0	0	0.00225512	0.0103932	0.00951074	0.00186293	0	0	0.0437298	0.0486322	0.000784391	0	0	0	0	0	0
MO BIO	Mobio65C.66.PreSD	0	0	0.00514037	0	0.00316331	0.0415184	0.013444	0.0280743	0.011467	0.0090945	0	0.489917	0	0.0292606	0.0933175	0	0.00355872	0	0	0.0431	0	0	0	0	0	0.0597074	0	0	0	0	0	0	0	0	0.00197707	0.013444	0	0	0	0.0656386	0.0427046	0.00237248	0	0	0	0	0	0
MO BIO	Mobio65C.67.PreSD	0	0	0.00515198	0	0.00450799	0.063627	0.0282071	0.0427615	0.00656878	0.00579598	0.0011592	0.520737	0.00489438	0.0150696	0.053323	0	0.00296239	0	0.00206079	0.0327151	0	0	0	0.00334879	0	0.0673622	0	0	0.00296239	0	0	0.00334879	0.000257599	0	0.00206079	0.00618238	0.00180319	0	0	0.0561566	0.0269191	0	0	0	0	0	0	0
MO BIO	Mobio65C.68.PreSD	0	0	0	0	0.00404858	0.0897436	0.0283401	0.123482	0.0128205	0	0	0.421053	0.00269906	0.0330634	0.0701754	0	0.00539811	0	0.00539811	0.0438596	0	0	0	0	0	0.0519568	0	0	0	0	0	0	0	0	0.00472335	0.00809717	0	0	0	0.0411606	0.00674764	0	0	0	0	0	0	0
MO BIO	Mobio65C.69.PreSD	0	0	0.00284206	0	0.00548112	0.0702395	0.0180674	0.0558262	0.00730816	0	0.00101502	0.446407	0.00304507	0.0235485	0.0842469	0	0.00527812	0	0.0046691	0.0375558	0	0	0	0	0	0.0598863	0	0	0.00954121	0	0	0	0.000812018	0	0.00142103	0.00588713	0.00223305	0	0	0.0619164	0.0227365	0	0	0	0	0	0	0
MO BIO	Mobio65C.70.PreSD	0	0	0.00174571	0	0.00320047	0.0578993	0.0189118	0.0625546	0.00814664	0.00931045	0.00843759	0.441664	0.00436427	0.00698283	0.0741926	0	0.000872854	0	0.00610998	0.0535351	0	0	0	0	0.00145476	0.0680826	0	0	0.00378237	0	0	0	0	0	0	0.00552808	0	0	0	0.077975	0.0311318	0	0	0	0	0	0	0
MO BIO	Mobio65C.71.PreSD	0	0	0	0	0	0	0	0	0	0	0	0.651567	0	0	0	0	0.00329154	0.00454545	0.00705329	0.0940439	0.00564263	0	0	0.000783699	0	0.0612853	0.00250784	0	0.00125392	0	0.0039185	0	0	0.0023511	0.00485893	0.011442	0	0	0	0.069279	0.0534483	0.00109718	0	0	0	0.00109718	0	0
MO BIO	Mobio65C.72.PreSD	0	0	0	0	0	0	0	0	0	0	0	0.62616	0	0	0	0	0.00348028	0.00493039	0.0194316	0.0948376	0.0075406	0	0	0	0	0.0672854	0	0	0.00174014	0	0.00319026	0.00435035	0	0.00319026	0.00667053	0.0156613	0	0	0	0.0568445	0.0611949	0.000580046	0	0	0	0	0	0
MO BIO	Mobio65C.73.PreSD	0	0	0	0	0	0	0	0	0	0	0	0.577725	0	0	0	0	0.00615446	0.00655152	0.0083383	0.114354	0.00754417	0	0	0	0	0.0798094	0.00138972	0	0.00198531	0	0.00297796	0	0	0	0.00536033	0.0240222	0	0	0	0.0623387	0.0641255	0.00178678	0	0	0	0	0	0
MO BIO	Mobio65C.74.PreSD	0	0	0	0	0	0	0	0	0	0	0	0.57951	0	0	0	0	0.00784407	0.00546708	0.00427858	0.151177	0.00404088	0.000950796	0	0	0.00522938	0.0820062	0	0	0	0	0.00166389	0	0	0.00213929	0.00641787	0.0242453	0	0	0	0.0594248	0.0458759	0.00356549	0	0	0	0	0	0
MO BIO	Mobio65C.75.PreSD	0	0	0	0	0	0	0	0	0	0	0	0.595331	0	0	0	0	0.0042153	0.00875486	0.00745785	0.1631	0.00875486	0	0	0	0	0.0583658	0	0	0.00162127	0	0.00324254	0	0	0.00389105	0.00226978	0.0220493	0	0	0	0.0502594	0.0470169	0	0	0	0	0	0	0
MO BIO	Mobio65C.76.PreSD	0	0	0	0	0	0	0	0	0	0	0	0.450167	0	0	0	0	0.00350821	0.0022325	0.0115612	0.174852	0.00358794	0.00398661	0	0.000318928	0	0.110748	0.000956785	0.000239196	0.00582044	0.000797321	0.00255143	0.0024717	0	0.00271089	0.0024717	0.0161059	0.00111625	0	0.000717589	0.0627492	0.0732738	0	0	0.000637857	0	0	0	0
MO BIO	Mobio65C.77.PreSD	0	0	0	0.0027137	0	0	0	0	0	0	0	0.507802	0	0	0	0	0	0.00678426	0.00983718	0.111262	0	0.00373134	0	0	0	0.128223	0	0	0	0	0.00339213	0	0	0.00373134	0.00983718	0.0196744	0	0	0	0.0440977	0.0661465	0	0	0	0.00203528	0	0	0
MO BIO	Mobio65C.78.PreSD	0	0	0	0	0	0	0	0	0	0	0	0.29652	0	0	0	0	0.0181543	0	0.0257186	0.302572	0.0121029	0	0	0	0	0.101362	0	0	0	0	0	0	0	0	0.0166415	0.01059	0	0	0	0.0514372	0.113464	0	0	0	0	0	0	0
MO BIO	Mobio65C.79.PreSD	0	0	0	0.00414708	0	0	0	0	0	0	0	0.449267	0	0	0	0	0.0290296	0.0306884	0.0223942	0.139342	0.00552944	0	0	0	0	0.101742	0	0	0	0	0.00691181	0	0	0.00138236	0.00608239	0.0118883	0	0	0	0.0713298	0.0677357	0	0	0	0	0	0	0
MO BIO	Mobio65C.80.PreSD	0.00058072	0	0	0	0	0	0	0	0	0	0	0.512776	0	0	0	0	0.0110337	0.0121951	0.0238095	0.116434	0.0058072	0	0	0	0.00377468	0.0958188	0.00232288	0	0.0014518	0	0	0	0	0	0.0110337	0.011324	0	0	0	0.0534262	0.0699768	0	0	0	0	0	0	0
Promega	Promega.41.PreSD	0	0	0	0	0	0.072953	0.00543267	0.0504463	0.00194024	0	0	0.553357	0	0	0.0131936	0.00349243	0	0	0.0232829	0.0593714	0	0	0	0	0.00388048	0.0438494	0	0	0	0	0	0.00543267	0	0	0.00232829	0	0	0	0	0.0372526	0.0174622	0.00426853	0	0	0	0	0	0.00465658
Promega	Promega.42.PreSD	0	0	0	0	0	0.0775463	0.00848765	0.0617284	0.00694444	0	0	0.36034	0	0	0.070216	0.00578704	0	0	0.0393519	0.0887346	0	0	0	0.00192901	0.0111883	0.0648148	0	0	0.00617284	0	0	0	0	0	0.00501543	0.0131173	0	0	0	0.0906636	0.0212191	0	0	0	0	0	0	0.00540123
Promega	Promega.43.PreSD	0	0	0	0	0	0.072711	0	0.0336625	0.000897666	0	0	0.591562	0	0	0.00897666	0	0	0	0.0139138	0.0547576	0	0	0	0	0	0.0448833	0	0	0.002693	0	0	0.00987433	0	0	0.0040395	0	0	0	0	0.0399461	0.0336625	0	0	0	0	0	0	0
Promega	Promega.44.PreSD	0	0	0	0	0	0.0448	0.0048	0.0482286	0.00251429	0	0	0.480457	0	0	0.0338286	0.00411429	0	0	0.0326857	0.0774857	0	0	0	0.000914286	0.00457143	0.064	0	0	0.00845714	0	0	0.00708571	0.000685714	0	0.00342857	0.0109714	0	0	0	0.0596571	0.0310857	0.00182857	0	0	0	0	0	0.00342857
Promega	Promega.45.PreSD	0	0	0	0	0	0.0521512	0.00316633	0.0396722	0.00260756	0	0	0.514435	0	0	0.0582976	0	0	0	0.0283107	0.0461911	0	0	0	0.00167629	0.0065189	0.040231	0	0.000931272	0.00838145	0	0	0.00707767	0.000745018	0	0.00298007	0.0154591	0.00149004	0.000745018	0	0.0495437	0.0214193	0	0	0.00149004	0	0	0	0.00223505
Promega	Promega.46.PreSD	0	0	0	0	0	0.18542	0	0	0	0	0	0.282362	0	0	0	0	0	0.00115407	0.0130794	0.197346	0	0.00634737	0	0	0	0.0832852	0.00134641	0	0	0.00211579	0.00288517	0.00115407	0	0.00442393	0.00480862	0.0251972	0	0	0	0.0527024	0.0480862	0.00288517	0	0.00115407	0	0	0	0
Promega	Promega.47.PreSD	0	0	0	0	0	0.164356	0	0	0	0	0	0.380814	0	0	0	0	0	0	0.00178891	0.19119	0.000894454	0.00111807	0	0	0.00201252	0.0679785	0.00178891	0	0.0049195	0	0.00402504	0	0	0.00245975	0.00469589	0.0245975	0	0	0	0.0375671	0.0402504	0.00178891	0	0	0	0	0.00134168	0
Promega	Promega.48.PreSD	0	0.000444741	0	0	0	0.191461	0	0	0	0	0	0.27018	0	0	0	0	0	0	0.0104514	0.165666	0	0	0	0	0.0204581	0.112075	0.00311319	0	0.00155659	0	0.00266845	0.0037803	0	0	0.00800534	0.0157883	0	0	0	0.0938403	0.0629308	0	0	0	0	0	0.00111185	0
Promega	Promega.49.PreSD	0	0	0	0	0	0.169749	0	0	0	0	0	0.39529	0	0	0	0	0.00252884	0.0026869	0.00158053	0.185554	0.00205469	0	0	0	0.00205469	0.0654339	0.0026869	0	0	0.00110637	0.00395132	0	0	0.00379327	0.00979927	0.0134345	0	0	0	0.0422001	0.038881	0.00173858	0	0	0.00142248	0	0	0
Promega	Promega.50.PreSD	0	0	0	0	0	0.21688	0	0	0	0	0	0.282864	0	0	0	0	0	0	0.0184143	0.186701	0	0.0056266	0	0	0.00971867	0.117136	0	0	0	0	0.00716113	0	0	0	0.00102302	0.0107417	0	0	0	0.0654731	0.0358056	0	0	0	0	0	0	0
Promega	Promega.51.PreSD	0	0	0	0	0	0.139023	0	0	0	0	0	0.474191	0	0	0	0	0	0.00825877	0	0.130076	0	0	0	0	0.00206469	0.100482	0	0	0.00344116	0	0	0	0	0.00412939	0.00619408	0.0199587	0	0	0	0.0612526	0.0289057	0	0	0	0	0	0	0
Promega	Promega.52.PreSD	0	0	0	0	0	0.0859574	0	0	0.0212766	0	0	0.206809	0	0	0	0	0	0	0.0229787	0.121702	0	0	0	0	0	0.278298	0	0	0.0161702	0	0	0.012766	0	0	0.00680851	0.0161702	0	0	0	0.102128	0.0868085	0	0	0	0	0	0	0
Promega	Promega.53.PreSD	0	0	0	0	0	0.20392	0	0	0	0	0	0.366575	0	0	0	0	0.00469968	0.00286566	0.00882623	0.137208	0.00332416	0	0	0	0.00343879	0.0708391	0	0.00137552	0	0.00206327	0.0043558	0.00481431	0	0.00126089	0.00378267	0.0220083	0.00103164	0	0	0.0685465	0.0574278	0.00137552	0	0.00194865	0	0	0	0
Promega	Promega.54.PreSD	0	0	0	0	0	0.251337	0	0	0	0	0	0.330728	0	0	0	0	0	0.0015083	0.0142602	0.145345	0	0	0	0.000959824	0.00411353	0.088441	0.000548471	0	0	0.00123406	0.00411353	0.00109694	0	0.00178253	0.00425065	0.0109694	0	0	0	0.0590978	0.0494995	0.00137118	0	0	0	0	0	0
Promega	Promega.55.PreSD	0	0	0	0	0	0.251836	0	0	0	0	0	0.242656	0	0	0	0	0	0	0.0299878	0.116432	0	0	0	0	0.0111689	0.136475	0	0	0	0.00168299	0.00198898	0.00688494	0	0.00122399	0.00428397	0.0189718	0.00198898	0.000764994	0	0.0963892	0.0546206	0.000764994	0	0	0	0	0	0
Promega	Promega.56.PreSD	0	0	0	0	0	0.255115	0	0	0	0	0	0.336829	0	0	0	0	0	0.00127877	0.00434783	0.145269	0	0	0	0	0	0.0672634	0.00179028	0	0.0028133	0	0.00319693	0	0	0.00191816	0.00639386	0.0246803	0.00102302	0	0	0.033376	0.0640665	0.00217391	0	0	0	0	0	0
Promega	Promega.57.PreSD	0	0	0	0	0	0.14133	0	0	0	0	0	0.378266	0	0	0	0	0	0	0.00475059	0.131235	0	0.00415677	0	0	0	0.0926366	0	0	0.00831354	0	0.00534442	0	0	0	0.00712589	0.0332542	0	0	0	0.0736342	0.0647268	0.00415677	0	0	0	0	0	0
Promega	Promega.58.PreSD	0	0.000496853	0	0	0	0.139533	0	0	0	0	0	0.442448	0	0	0	0	0.00207022	0.00331236	0.00405763	0.146986	0.0037264	0	0	0.000248427	0.00231865	0.0741968	0.00157337	0	0.00231865	0.000579662	0.0019046	0	0	0.00273269	0.00579662	0.0211991	0.000414044	0	0	0.0468698	0.0352766	0.00207022	0	0	0.000662471	0	0	0
Promega	Promega.59.PreSD	0	0	0	0	0	0.143377	0	0	0	0	0	0.414355	0	0	0	0	0	0.00277393	0.00780166	0.156727	0	0	0	0	0.00346741	0.103329	0	0	0.00260055	0	0.00156033	0.00346741	0	0.00381415	0.00381415	0.0183773	0.00104022	0	0	0.0488904	0.0426491	0	0	0	0	0	0	0
Promega	Promega.60.PreSD	0	0	0	0	0	0.225492	0	0	0	0	0	0.323524	0	0	0	0	0.0014714	0	0.0102998	0.130219	0	0	0	0	0.0051499	0.101343	0.00239102	0.000551775	0	0	0.00239102	0	0	0.00257495	0.0029428	0.014714	0	0	0	0.0838698	0.049108	0.00202317	0	0.0014714	0	0	0	0
Promega	Promega.61.PreSD	0	0	0	0	0	0.172539	0	0	0	0	0	0.335966	0	0	0	0	0	0	0.00425273	0.206561	0.00425273	0.0121507	0	0	0	0.0662211	0	0	0	0	0.00486027	0	0	0	0	0.0243013	0	0	0	0.0449575	0.0504253	0	0	0	0	0	0	0
Promega	Promega.62.PreSD	0	0	0	0	0	0.217106	0	0	0	0	0	0.369873	0	0	0	0	0	0.00457387	0.00594603	0.176551	0	0	0	0	0	0.0515322	0.00228693	0	0.00426894	0.00289678	0.00426894	0	0	0.00213447	0.00518372	0.0204299	0	0	0	0.0321695	0.0355237	0.000609849	0	0	0	0	0	0
Promega	Promega.63.PreSD	0	0.00043153	0	0	0	0.13809	0	0	0	0	0	0.434264	0	0	0	0	0.00287687	0.00474684	0.0102129	0.104287	0.00258918	0	0	0.000719217	0	0.125144	0.00172612	0.00129459	0.00215765	0.00172612	0	0	0	0.00489068	0.0033084	0.0176928	0	0.000719217	0	0.0526467	0.0405639	0.00215765	0	0	0	0	0	0
Promega	Promega.65.PreSD	0	0	0	0	0	0.154888	0	0	0	0	0	0.367464	0	0	0	0	0.00338677	0.00564462	0.01366	0.131068	0.00259652	0	0	0.000338677	0.000677354	0.12802	0.000903138	0	0	0.00282231	0	0	0	0.00282231	0.00474148	0.0285618	0.00112892	0	0	0.0517047	0.043012	0.00270942	0	0	0	0	0	0
Promega	Promega.66.PreSD	0	0	0.00231238	0	0	0.0382594	0.00988018	0.0340551	0.00672693	0.0037839	0	0.422956	0.0025226	0.0374185	0.101114	0	0.00210217	0	0.00336346	0.0588606	0	0	0	0.00063065	0	0.0782005	0	0	0.00714736	0	0	0.00483498	0	0	0	0.0189195	0	0	0	0.0649569	0.0454068	0.00147152	0	0	0	0	0	0
Promega	Promega.67.PreSD	0	0	0.00215924	0	0	0.0561404	0.0203779	0.0535762	0.00890688	0.00364372	0.00188934	0.546289	0.00269906	0.0180837	0.0603239	0	0.00202429	0	0.00161943	0.0272605	0	0	0	0.00188934	0	0.0693657	0	0	0.0022942	0	0	0.00796221	0	0	0.00148448	0.0103914	0	0	0	0.0329285	0.0260459	0.00580297	0	0	0	0	0	0
Promega	Promega.68.PreSD	0	0	0	0	0.00632667	0.0497647	0.0124219	0.090348	0.00470643	0.00416635	0.000617236	0.343955	0.00324049	0.015971	0.0408919	0	0.000462927	0	0.00779261	0.0374971	0	0	0	0.00246895	0.000925854	0.151917	0	0	0.00771545	0	0	0.00432065	0.000231464	0	0.00146594	0.00439781	0.00208317	0	0	0.0972919	0.0266955	0.00131163	0	0	0	0	0	0
Promega	Promega.69.PreSD	0	0	0	0	0.00696749	0.0773059	0.0162575	0.0587259	0.00796284	0.00431321	0	0.450896	0.0023225	0.0179164	0.0842734	0	0.00265428	0	0.00597213	0.0199071	0	0	0	0	0	0.0693431	0	0	0.00928998	0	0	0.0066357	0	0	0	0.0159257	0	0	0	0.0487724	0.0441274	0.00630392	0	0	0	0	0	0
Promega	Promega.70.PreSD	0	0	0.00229406	0	0.00187696	0.0502607	0.0110532	0.0479666	0.00750782	0	0.00437956	0.547237	0.00145985	0.00625652	0.0736184	0	0	0	0.0114703	0.04317	0	0	0	0.000834202	0	0.0485923	0	0	0.00458811	0	0	0.0012513	0	0	0	0.00959333	0	0	0	0.037122	0.0331595	0.0016684	0	0	0	0	0	0
Promega	Promega.71.PreSD	0	0	0	0	0	0	0	0	0	0	0	0.643634	0	0	0	0	0.00543826	0.00543826	0.00671785	0.131158	0.00159949	0	0	0	0	0.0515035	0.00255918	0.000639795	0	0	0.00575816	0	0	0.00287908	0.00191939	0.037428	0	0	0	0.0265515	0.0390275	0.00287908	0	0	0	0	0	0
Promega	Promega.72.PreSD	0	0	0	0	0	0	0	0	0	0	0	0.531503	0	0	0	0	0.00246889	0.00118507	0.00474027	0.0948055	0.00217262	0	0	0	0.000790045	0.112186	0.00335769	0.000395023	0.00572783	0.00207387	0.00414774	0.00404898	0	0.00227138	0.000888801	0.0267628	0	0	0	0.123642	0.0549082	0.00286391	0	0	0	0	0	0
Promega	Promega.73.PreSD	0	0	0	0	0	0	0	0	0	0	0	0.586152	0	0	0	0	0.0030018	0	0.0120072	0.102261	0.00340204	0	0	0	0.00240144	0.106864	0	0	0.00740444	0.00160096	0.00280168	0	0	0.00160096	0.00220132	0.0168101	0	0	0	0.075045	0.0474285	0	0	0	0	0.00080048	0	0
Promega	Promega.74.PreSD	0	0	0	0	0	0	0	0	0	0	0	0.616761	0	0	0	0	0	0	0.0152103	0.152699	0	0	0	0	0.00447361	0.0635252	0	0	0	0.00357888	0	0.00417537	0	0.00357888	0.00238592	0.022368	0	0	0	0.0447361	0.045929	0.00238592	0	0	0	0	0	0
Promega	Promega.75.PreSD	0	0	0	0	0	0	0	0	0	0	0	0.597615	0	0	0	0	0.00292948	0.00292948	0.00303411	0.205796	0.00376648	0.00094162	0	0	0	0.0466625	0.00334798	0	0.00449885	0.00219711	0.00209249	0	0	0.00251099	0.000836995	0.0236451	0.000627746	0	0	0.0351538	0.0340029	0.000836995	0	0	0	0.000418498	0	0
Promega	Promega.76.PreSD	0	0	0	0	0	0	0	0	0	0	0	0.436536	0	0	0	0	0	0	0.0033451	0.226166	0	0	0	0	0	0.0990522	0.00353094	0	0.00223007	0.00260175	0.00538933	0.00408846	0	0.00446014	0.00167255	0.0338227	0	0	0	0.0594685	0.069318	0.00185839	0	0	0	0	0	0
Promega	Promega.77.PreSD	0	0	0	0	0	0	0	0	0	0	0	0.472278	0	0	0	0	0	0.00233801	0.00434202	0.155979	0	0	0	0.00183701	0	0.121576	0.00317301	0	0.00217101	0.00300601	0.00384102	0.00133601	0	0.00217101	0.00300601	0.0272211	0	0	0	0.0848363	0.0637943	0.001002	0	0	0	0	0	0
Promega	Promega.78.PreSD	0	0	0	0	0	0	0	0	0	0	0	0.46069	0	0	0	0	0	0.00275862	0.0229885	0.137011	0	0	0	0	0	0.114023	0	0	0	0	0.00367816	0	0	0.00321839	0	0.0156322	0	0	0	0.0965517	0.0606897	0	0	0	0	0	0	0
Promega	Promega.79.PreSD	0	0	0	0	0	0	0	0	0	0	0	0.46587	0	0	0	0	0.00546075	0.00307167	0.0262799	0.11843	0	0	0	0.00102389	0	0.108874	0	0	0.00614334	0	0.00477816	0.00716724	0	0.00238908	0.00273038	0.0105802	0	0	0	0.0791809	0.0474403	0.00273038	0	0	0	0	0	0
Promega	Promega.80.PreSD	0	0	0	0	0	0	0	0	0	0	0	0.662252	0	0	0	0	0	0	0.00662252	0.0781457	0	0	0	0	0	0.0463576	0	0	0	0	0	0	0	0	0.0119205	0.0304636	0	0	0	0.0317881	0.0397351	0	0	0	0	0	0	0
[truncated: 10 more columns]

## Sheet: DADA2 & Greengenes_ genus table
	QIAamp® PowerFecal®	Maxwell® RSC PureFood GMO and Authentication	p value
k__Bacteria;p__Firmicutes;c__Bacilli;o__Lactobacillales;f__Lactobacillaceae;g__Lactobacillus	0.66 ± 0.69	0.11 ± 0.17	5.54e-08
k__Bacteria;p__Firmicutes;c__Clostridia;o__Clostridiales;f__Clostridiaceae;NA	0.37 ± 0.43	0.08 ± 0.14	0.0008387
k__Bacteria;p__Firmicutes;c__Clostridia;o__Clostridiales;f__Ruminococcaceae;NA	0.72 ± 0.52	0.36 ± 0.28	0.001598
k__Bacteria;p__Firmicutes;c__Clostridia;o__Clostridiales;f__Ruminococcaceae;g__	1.29 ± 0.70	1.86 ± 0.86	0.002572
k__Bacteria;p__Firmicutes;c__Clostridia;o__Clostridiales;f__Lachnospiraceae;g__Coprococcus	0.12 ± 0.20	0.34 ± 0.37	0.003089
k__Bacteria;p__Firmicutes;c__Clostridia;o__Clostridiales;f__Lachnospiraceae;g__[Ruminococcus]	0.10 ± 0.17	0.28 ± 0.34	0.007689
k__Bacteria;p__Firmicutes;c__Clostridia;o__Clostridiales;f__Peptococcaceae;g__rc4-4	0.09 ± 0.12	0.17 ± 0.16	0.03564
k__Bacteria;p__Firmicutes;c__Bacilli;o__Turicibacterales;f__Turicibacteraceae;g__Turicibacter	0.44 ± 0.64	0.14 ± 0.21	0.03822
k__Bacteria;p__Actinobacteria;c__Actinobacteria;o__Bifidobacteriales;f__Bifidobacteriaceae;g__Bifidobacterium	0.12 ± 0.31	0.02 ± 0.06	0.04796
k__Bacteria;p__Firmicutes;c__Clostridia;o__Clostridiales;f__Ruminococcaceae;g__Ruminococcus	5.16 ± 2.58	4.44 ± 1.48	0.1092
k__Bacteria;p__Firmicutes;c__Clostridia;o__Clostridiales;f__;g__	11.67 ± 6.72	12.36 ± 5.42	0.1916
k__Bacteria;p__Tenericutes;c__Mollicutes;o__RF39;f__;g__	0.11 ± 0.13	0.08 ± 0.11	0.3096
k__Bacteria;p__Bacteroidetes;c__Bacteroidia;o__Bacteroidales;f__Bacteroidaceae;g__Bacteroides	12.70 ± 10.57	10.36 ± 8.63	0.3559
k__Bacteria;p__Proteobacteria;c__Betaproteobacteria;o__Burkholderiales;f__Alcaligenaceae;g__Sutterella	0.76 ± 0.71	0.88 ± 0.73	0.4209
k__Bacteria;p__Bacteroidetes;c__Bacteroidia;o__Bacteroidales;f__S24-7;g__	41.90 ± 11.76	43.39 ± 11.52	0.5485
k__Bacteria;p__Verrucomicrobia;c__Verrucomicrobiae;o__Verrucomicrobiales;f__Verrucomicrobiaceae;g__Akkermansia	0.96 ± 0.78	1.10 ± 0.89	0.5655
k__Bacteria;p__Firmicutes;c__Clostridia;o__Clostridiales;NA;NA	0.97 ± 0.67	1.18 ± 0.98	0.6379
k__Bacteria;p__Firmicutes;c__Clostridia;o__Clostridiales;f__Lachnospiraceae;g__Dorea	0.22 ± 0.25	0.22 ± 0.22	0.6416
k__Bacteria;p__Proteobacteria;c__Epsilonproteobacteria;o__Campylobacterales;f__Helicobacteraceae;g__Flexispira	0.13 ± 0.42	0.07 ± 0.27	0.6756
k__Bacteria;p__Firmicutes;c__Clostridia;o__Clostridiales;f__Lachnospiraceae;NA	0.22 ± 0.35	0.26 ± 0.43	0.6932
k__Bacteria;p__Firmicutes;c__Clostridia;o__Clostridiales;f__Lachnospiraceae;g__	8.16 ± 3.05	8.91 ± 4.28	0.7073
k__Bacteria;p__TM7;c__TM7-3;o__CW040;f__F16;g__	0.30 ± 0.74	0.27 ± 0.56	0.7694
k__Bacteria;p__Tenericutes;c__Mollicutes;o__Anaeroplasmatales;f__Anaeroplasmataceae;g__Anaeroplasma	1.76 ± 1.65	2.02 ± 2.21	0.7806
k__Bacteria;p__Bacteroidetes;c__Bacteroidia;o__Bacteroidales;f__Porphyromonadaceae;g__Parabacteroides	0.34 ± 0.75	0.24 ± 0.51	0.7871
k__Bacteria;p__Proteobacteria;c__Epsilonproteobacteria;o__Campylobacterales;f__Helicobacteraceae;g__Helicobacter	1.23 ± 2.51	0.84 ± 1.66	0.8556
k__Bacteria;p__Firmicutes;c__Clostridia;o__Clostridiales;f__Ruminococcaceae;g__Oscillospira	5.76 ± 1.84	6.06 ± 2.42	0.8569
k__Bacteria;p__Bacteroidetes;c__Bacteroidia;o__Bacteroidales;f__Prevotellaceae;g__Prevotella	1.29 ± 2.61	1.33 ± 2.43	0.865
k__Bacteria;p__Bacteroidetes;c__Bacteroidia;o__Bacteroidales;f__Rikenellaceae;g__	0.20 ± 0.37	0.18 ± 0.41	0.9369
k__Bacteria;p__Bacteroidetes;c__Bacteroidia;o__Bacteroidales;f__[Paraprevotellaceae];g__[Prevotella]	1.44 ± 2.98	1.40 ± 2.82	0.9712
k__Bacteria;p__Bacteroidetes;c__Bacteroidia;o__Bacteroidales;f__[Paraprevotellaceae];g__Paraprevotella	0.27 ± 0.80	0.25 ± 0.74	0.9812
